# Supplementary material for: Impact of lymph node evaluation standard in patients undergoing lung resection for clinical stage IA pulmonary adenocarcinoma and squamous cell carcinoma
Source: PubMed Central journal article supplement — J Thorac Dis. 2024 Nov 11;16(11):7663–74. doi: 10.21037/jtd-24-971 (PMC11635252; doi:10.21037/jtd-24-971), 2024-11-11
Supplement: jtd-16-11-7663-dss.pdf [file jtd-16-11-7663-dss.pdf]

## Data Sharing Statement

|                     |                                                                                                                                                     |                                                                                                                                                |
|---------------------|-----------------------------------------------------------------------------------------------------------------------------------------------------|------------------------------------------------------------------------------------------------------------------------------------------------|
| <b>Article Info</b> | <a href="https://dx.doi.org/10.21037/jtd-24-971">https://dx.doi.org/10.21037/jtd-24-971</a>                                                         |                                                                                                                                                |
| <b>Item</b>         | <b>Question</b>                                                                                                                                     | <b>Authors' Response<br/>(place "-" if not applicable)</b>                                                                                     |
| 1                   | Would you like to share data collected for your study to others?                                                                                    | Yes. Deidentified data would be available upon reasonable and well justified request.                                                          |
| 2                   | If not, would you like to share the reason for your decision?                                                                                       |                                                                                                                                                |
| 3                   | What data in particular will be shared?                                                                                                             | Lymph node evaluation data, pathologic upstaging, and survival data.                                                                           |
| 4                   | Any other documents will be shared? Such as study protocol, statistical analysis plan, informed consent form, clinical study report, analytic code. | No                                                                                                                                             |
| 5                   | When will data availability begin?                                                                                                                  | At the time of publication.                                                                                                                    |
| 6                   | When will data availability end?                                                                                                                    | One year from the study publication date.                                                                                                      |
| 7                   | To whom will you share the data?                                                                                                                    | Thoracic surgeons or medical oncologist who have submitted an argueded reasonable request.                                                     |
| 8                   | For what type of analysis or purpose?                                                                                                               | To analyze the impact of lymph node evaluation on outcomes of lung cancer patients.                                                            |
| 9                   | How or where can the data/documents be obtained?                                                                                                    | E-mail request can be sent to:<br>Tapias.Luis@mayo.edu                                                                                         |
| 10                  | Any other restrictions?                                                                                                                             | We will assess each request individually to assess benefits/risks of sharing the data. We also reserve the right of sharing only partial data. |
